# Supplementary material for: Hypogonadal men with moderate-to-severe lower urinary tract symptoms have a more severe cardiometabolic risk profile and benefit more from testosterone therapy than men with mild lower urinary tract symptoms
Source: PubMed Central journal article supplement — Investig Clin Urol. 2018 Nov 2;59(6):399–409. doi: 10.4111/icu.2018.59.6.399 (PMC6215782; doi:10.4111/icu.2018.59.6.399), 2018-11-02
Supplement: icu-59-399-s004.pdf [file icu-59-399-s004.pdf]

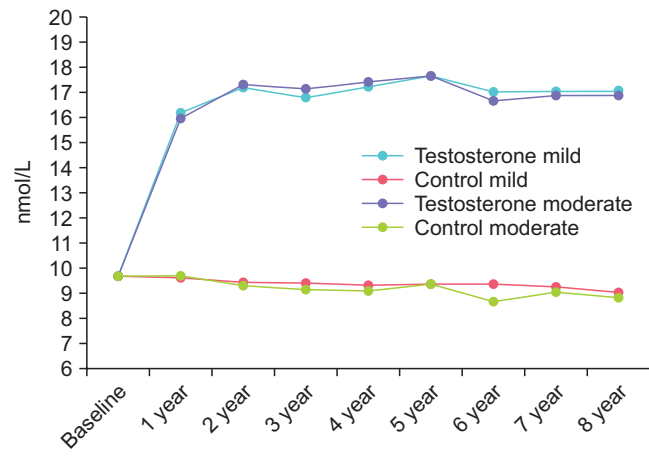

**Supplementary Fig. 4.** Testosterone (nmol/L) in men with mild IPSS with TTh and untreated controls, and in men with moderate-to-severe IPSS with TTh and untreated controls. IPSS, International Prostate Symptom Score; TTh, testosterone therapy.
